# Supplementary figures and images for: High SHP2 expression determines the efficacy of PD‐1/PD‐L1 inhibitors in advanced KRAS mutant non‐small cell lung cancer
Source: PubMed Central journal article supplement — Thorac Cancer. 2021 Sep 6;12(19):2564–73. doi: 10.1111/1759-7714.14137 (PMC8487814; doi:10.1111/1759-7714.14137), 2021-09-06

# Supplementary figure 2

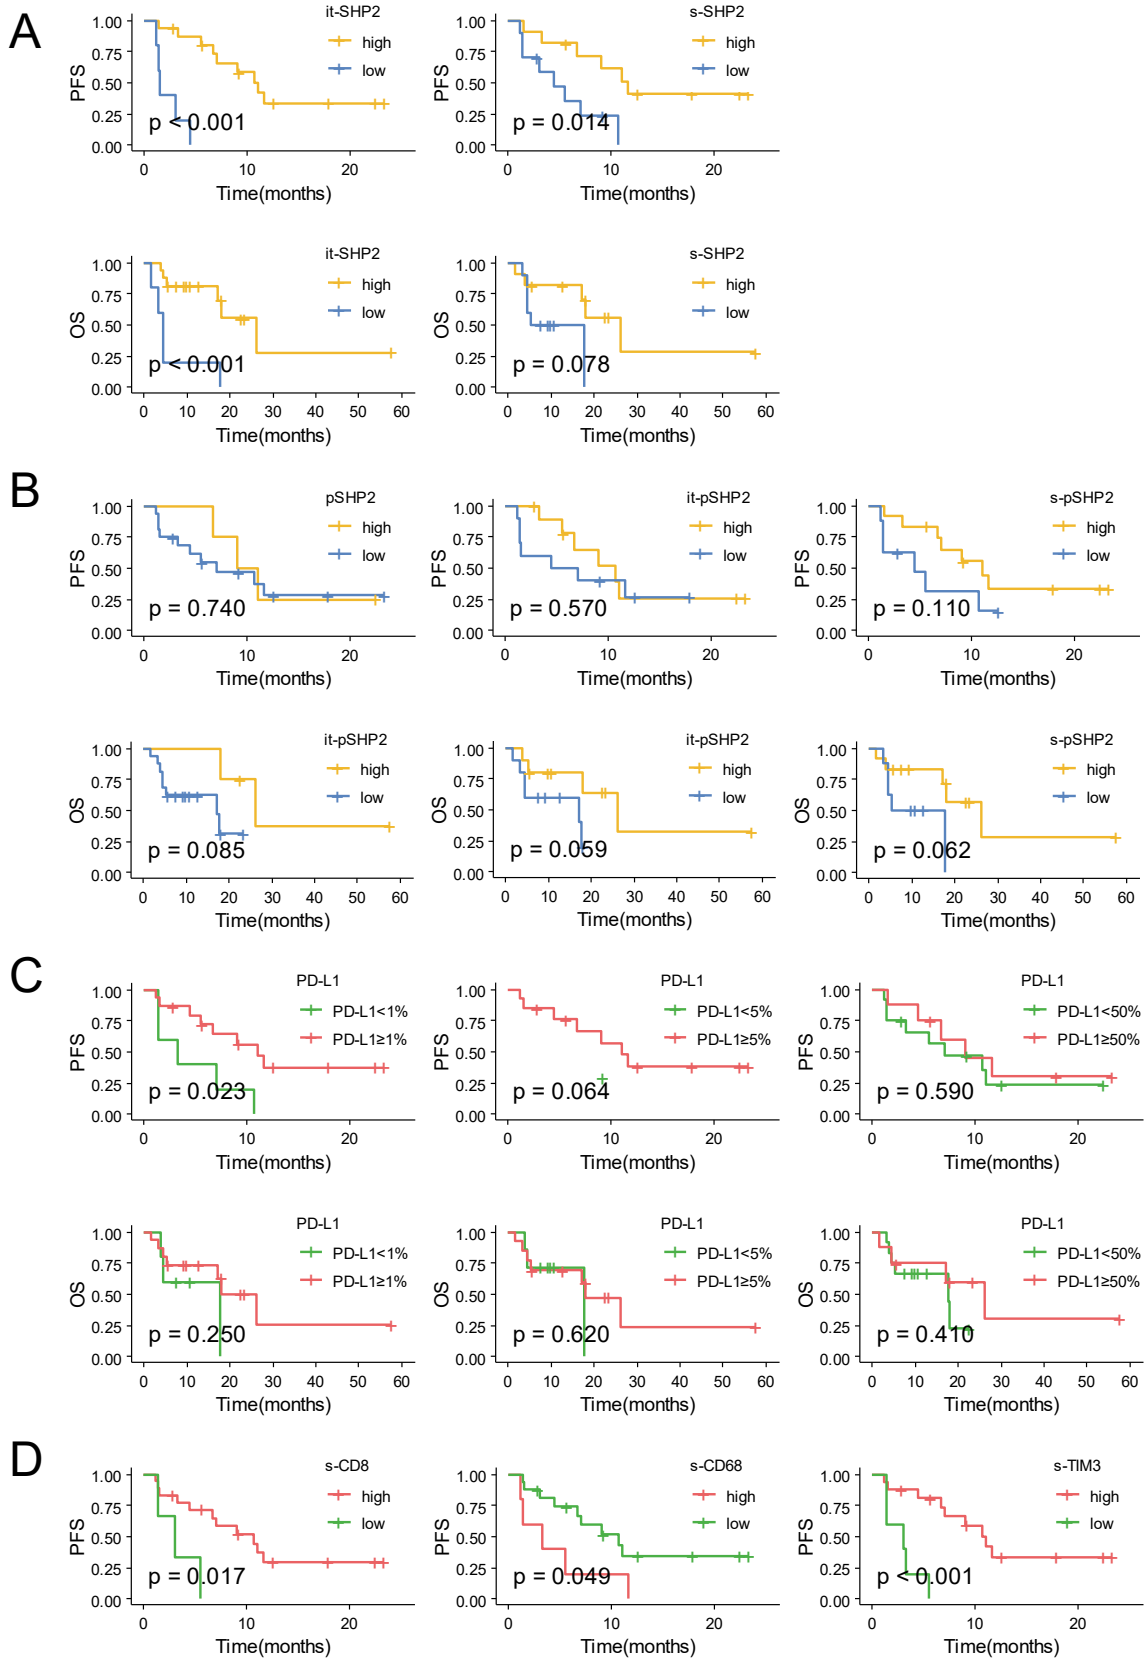

Supplement: TCA-12-2564-s001.pdf [file TCA-12-2564-s001.pdf]

# Supplementary figure 1

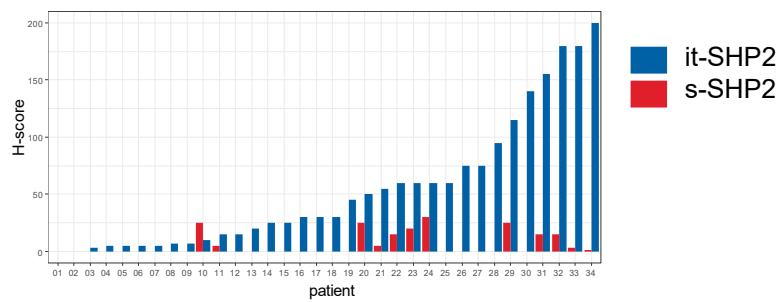

Supplement: TCA-12-2564-s002.pdf [file TCA-12-2564-s002.pdf]
